# Supplementary material
Source: PubMed Central journal article supplement (PMC10587781)
Supplement: jamaophthalmol-e234044-s002.pdf [file jamaophthalmol-e234044-s002.pdf]

## Data Sharing Statement

Popov. Using Smartphone Exophthalmometry to Measure Eyeball Protrusion. *JAMA Ophthalmol.* Published September 21, 2023. doi:10.1001/jamaophthalmol.2023.4044

### Data

**Data available:** No
